# Supplementary material for: Automatic Placement of Simulated Dental Implants Within CBCT Images in Optimum Positions: A Deep Learning Model
Source: Research Square preprint supplement (doi:10.21203/rs.3.rs-3097872/v1), 2023-07-14
Supplement: Supplementary file 1 [file 1b62a35e6784887bbf666e8d.docx]

**Highlights**

- Dental implantology is a complex process with multiple criteria.
- The three-dimensional scans of dental medicine are very informative, and utilizing them in deep-learning applications could be useful.
- The proposed models will assist dentists through automatically placing simulated implants within CBCT images in optimum size and position.
- The approach has two main steps: The first model is YOLOv3 that
  detected the markers in the scans. The second models were regression
  and classification models that predicts the optimal implant place, angulation, length and diameter within the marker position.
- The preliminary results are genuinely promising and could be improved in the
  future in several ways.
