# Supplementary material for: Automatic Placement of Simulated Dental Implants Within CBCT Images in Optimum Positions: A Deep Learning Model
Source: Research Square preprint supplement (doi:10.21203/rs.3.rs-3097872/v1), 2023-07-14

# Automatic Placement Of Simulated Dental Implants Within CBCT Images In Optimum Positions: A Deep Learning Model

## Problem statement

Performing the scans using a CBCT scanning machine.

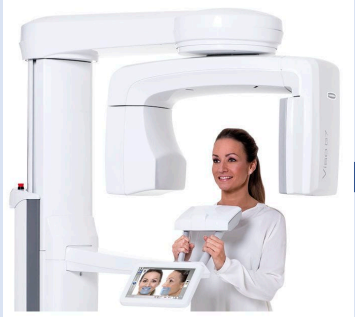

The CBCT imaging of a patient with atrophic maxilla.

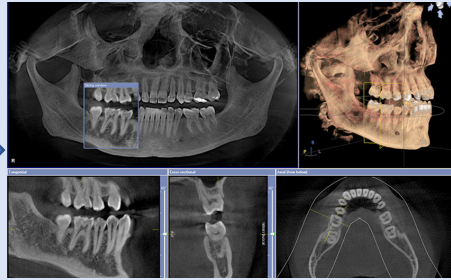

Implants' markers in CBCT scan.

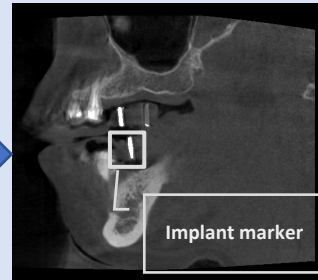

The size of implant depending on the bone size and nerve location.

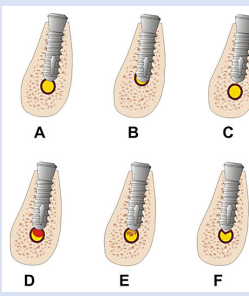

Resize

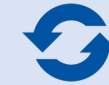

Reposition

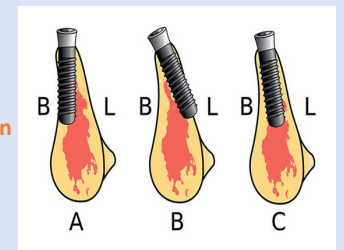

## Methodology

### Markers detection phase

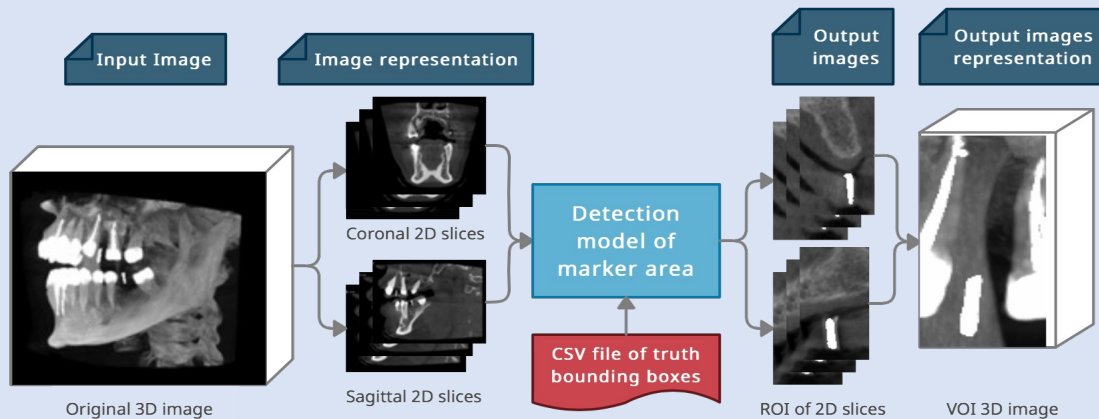

### Implant size and position prediction phase

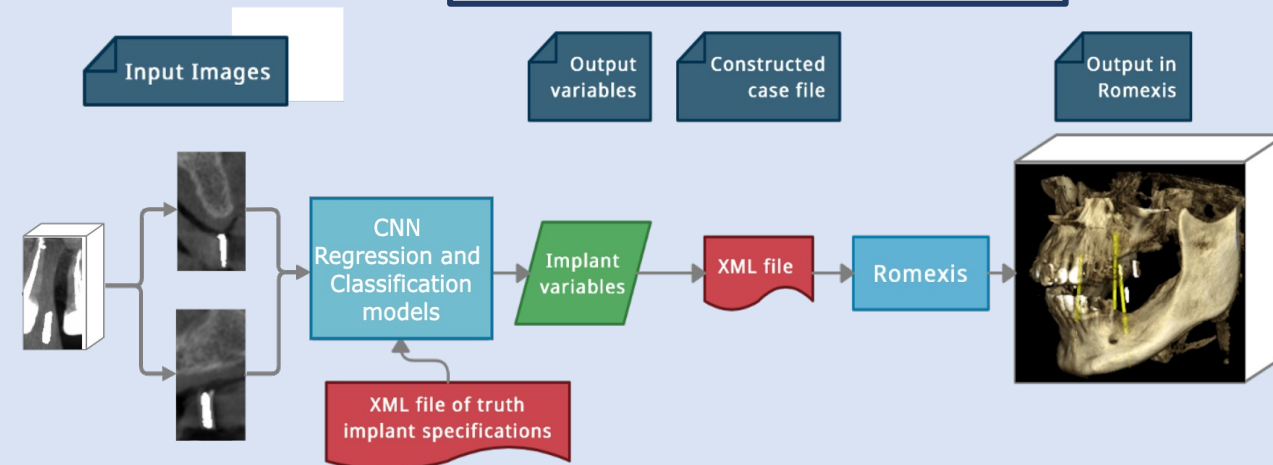

Supplement: Supplementary file 1 [file 82ddb1b30079d04069283d22.pdf]
